# Supplementary material for: Probing the inhomogeneity and intermediates in the photosensitized degradation of rhodamine B by Ag3PO4 nanoparticles from an ensemble to a single molecule approach
Source: Royal Society of Chemistry journal article supplement (doi:10.1039/c7ra07163a), 2017-01-01
Supplement: c7ra07163a1.pdf [file c7ra07163a1.pdf]

## Supporting Information

### Probing the Inhomogeneity and Intermediate in the photosensitized Degradation of Rhodamine B by $\text{Ag}_3\text{PO}_4$ Nanoparticle from Ensemble to Single Molecule

Beibei Xu, Xiaojuan Wang, Chaofeng Zhu, Xia Ran, Tianfeng Li\* and Lijun Guo\*

School of Physics and Electronics, Henan University, Kaifeng 475004, P. R. China

Figure 1S shows the XRD pattern of the as-obtained product. All of the diffraction peaks can be indexed to the cubic structure of  $\text{Ag}_3\text{PO}_4$  (JCPDS card No.06-0505). The X-ray photoelectron spectroscopy (XPS) was carried out to investigate the surface compositions and chemical state of the as-prepared  $\text{Ag}_3\text{PO}_4$  nanoparticles (Figure S2). In the XPS analysis, the binding energies were corrected by referencing C 1s of 284.80 eV. The Ag 3d spectra of  $\text{Ag}_3\text{PO}_4$  is composed of two individual peaks at  $\sim 374$  and  $\sim 368$  eV, which can be attributed to Ag  $3d_{3/2}$  and Ag  $3d_{5/2}$  binding energies, respectively (Figure S2b). In Figure S2c, the P 2p peak of the  $\text{Ag}_3\text{PO}_4$  product appears at ca. 132 eV, which corresponded to  $\text{P}^{5+}$ , and the O 1s binding energy (Figure S2d) of ca. 530 eV is in agreement with  $\text{O}^{2-}$  anion. Therefore, the XPS analysis confirms the purity of  $\text{Ag}_3\text{PO}_4$  product.

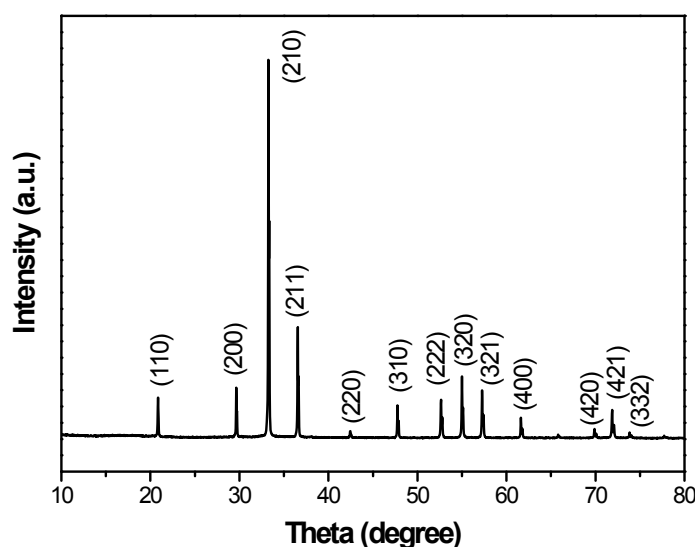

Figure S1. The XRD pattern of  $\text{Ag}_3\text{PO}_4$  nanoparticles. All of the diffraction peaks can be indexed to the cubic structure of  $\text{Ag}_3\text{PO}_4$  (JCPDS card No.06-0505).

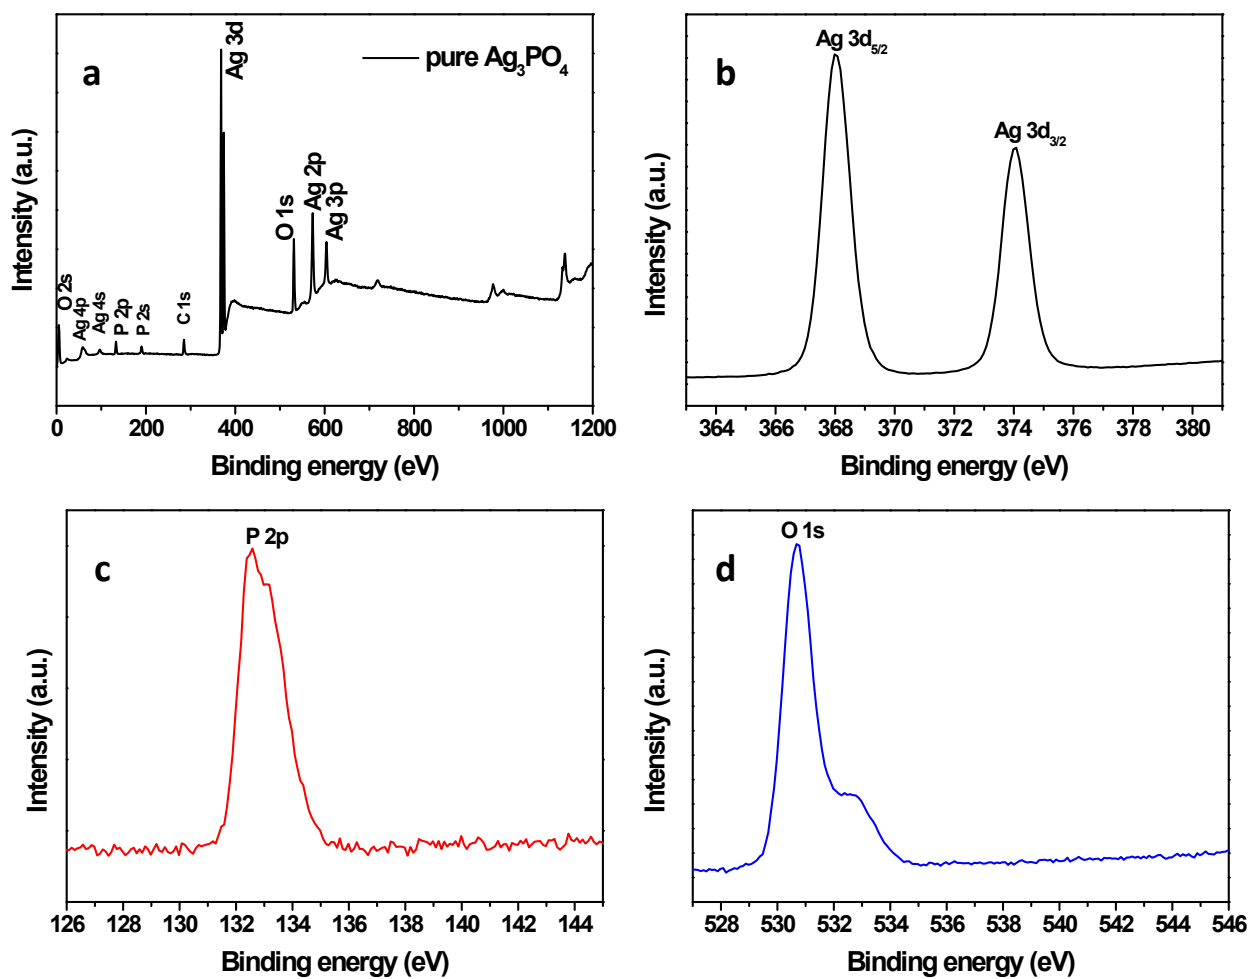

Figure S2. XPS spectra of  $\text{Ag}_3\text{PO}_4$  sample. (a) survey XPS spectrum, (b) Ag 3d, (c) P 2p, (d) O 1s.
